# Supplementary material
Source: PubMed Central journal article supplement (PMC6037413)
Supplement: NIHMS935989-supplement-supplement_1.pdf [file NIHMS935989-supplement-supplement_1.pdf]

## Supplementary Information

### Goblet Cell Associated Antigen Passages are Inhibited During *Salmonella typhimurium* Infection to Prevent Pathogen Dissemination and Limit Responses to Dietary Antigens

Devesha H. Kulkarni<sup>1</sup>, Keely G. McDonald<sup>1</sup>, Kathryn A. Knoop<sup>1</sup>, Jenny K. Gustafsson<sup>1</sup>, Konrad M. Kozlowski<sup>1</sup>, David A. Hunstad<sup>2,3</sup>, Mark J. Miller<sup>1</sup>, and Rodney D. Newberry<sup>1</sup>

Washington University School of Medicine, Department of Internal Medicine<sup>1</sup>, Department of Pediatrics<sup>2</sup>, Department of Molecular Microbiology<sup>3</sup>, Saint Louis, MO, 63110

Send correspondence to: [rnewberry@wustl.edu](mailto:rnewberry@wustl.edu)

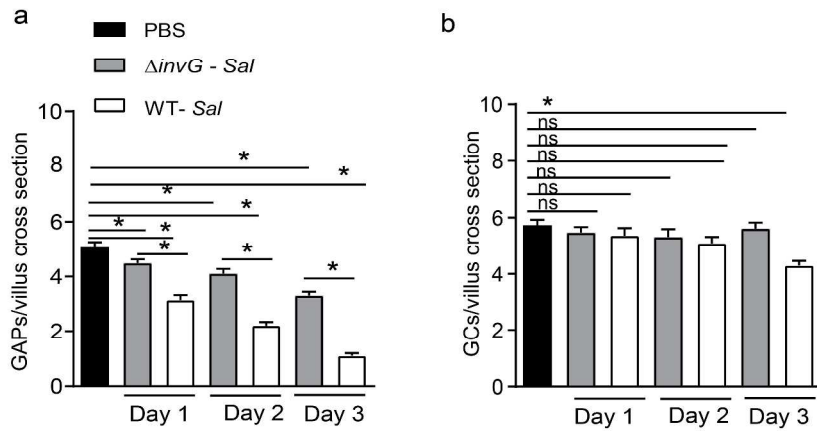

Figure S1

**Supp Figure 1: *Salmonella* inhibits GAPs independent of changes in GCs numbers.** (a) Density of SI GAPs and (b) GCs, identified by PAS staining, in mice infected with  $\Delta invG$  or wildtype *Salmonella*. N=4 or more mice, ns= not significant, \*=p<0.05, data presented as the mean  $\pm$  SEM.

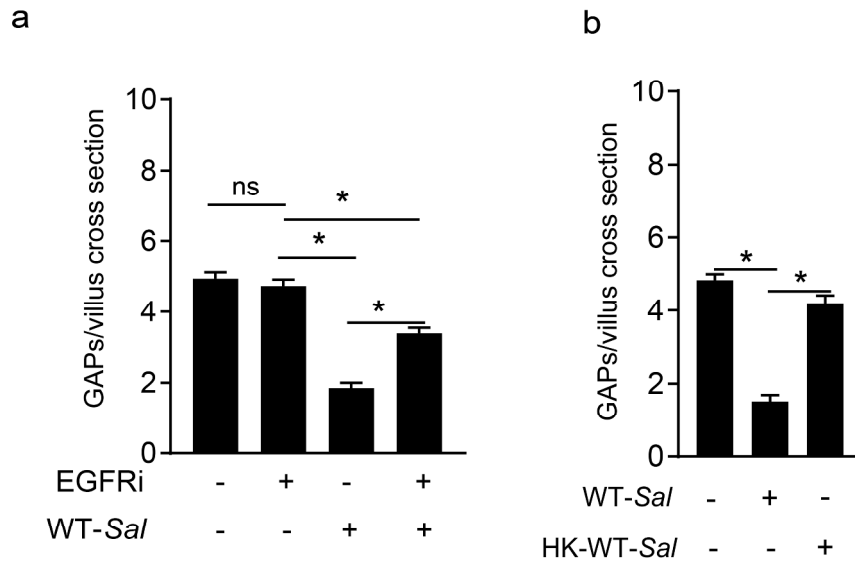

Figure S2

**Supp Figure 2:** *Blocking EGFR activation reverses GAP inhibition and heat-killed Salmonella is unable to inhibit GAPS.* Density of SI GAPS per villus cross section in C57BL/6 mice receiving vehicle or inhibition of EGFR activation (EGFRi) 2 days after oral administration of  $5 \times 10^7$  CFU *Salmonella* or PBS. (b) Density of GAPS in C57BL/6 mice, given  $5 \times 10^8$  CFU of wildtype or heat-killed wildtype *Salmonella* in the SI lumen 1 hr earlier. N=5 mice with 60 or more villus cross sections per mouse examined for each condition. ns= not significant, \* =  $p < 0.05$ , data presented as the mean  $\pm$  SEM.

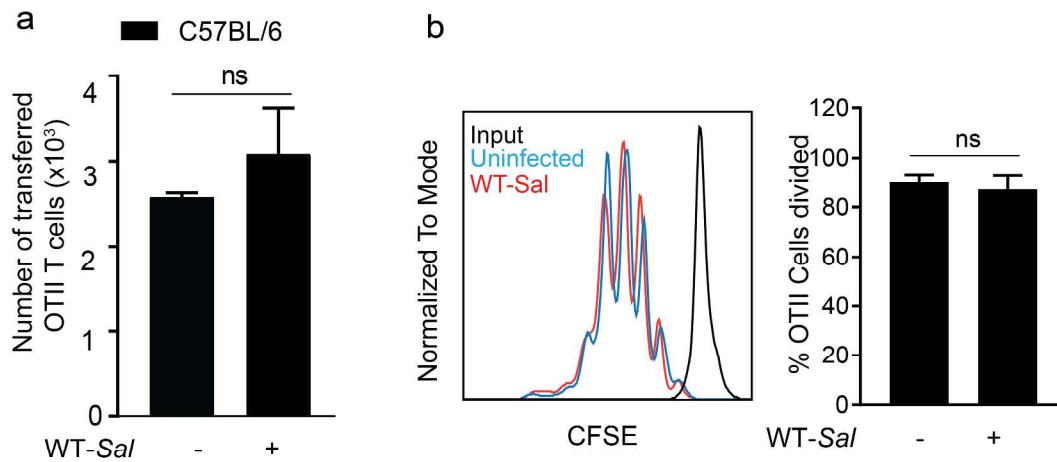

Figure S3

**Supp Figure 3:** Ova specific OTII T cell trafficking and proliferation in response to i.v antigen is not affected during infection. (a) Quantification of number of adoptively transferred Ova specific CD4<sup>+</sup> OTII T cells in the MLN of C57BL/6 mice that were uninfected or infected with  $5 \times 10^7$  CFU *Salmonella*. (b) Flow cytometry plots of CFSE dilution and quantification of Ova specific CD4<sup>+</sup> OTII T cells in the MLN of uninfected or infected C57BL/6 mice in response to systemic Ova. n=5 mice per group. ns= not significant, data presented as the mean  $\pm$  SEM.

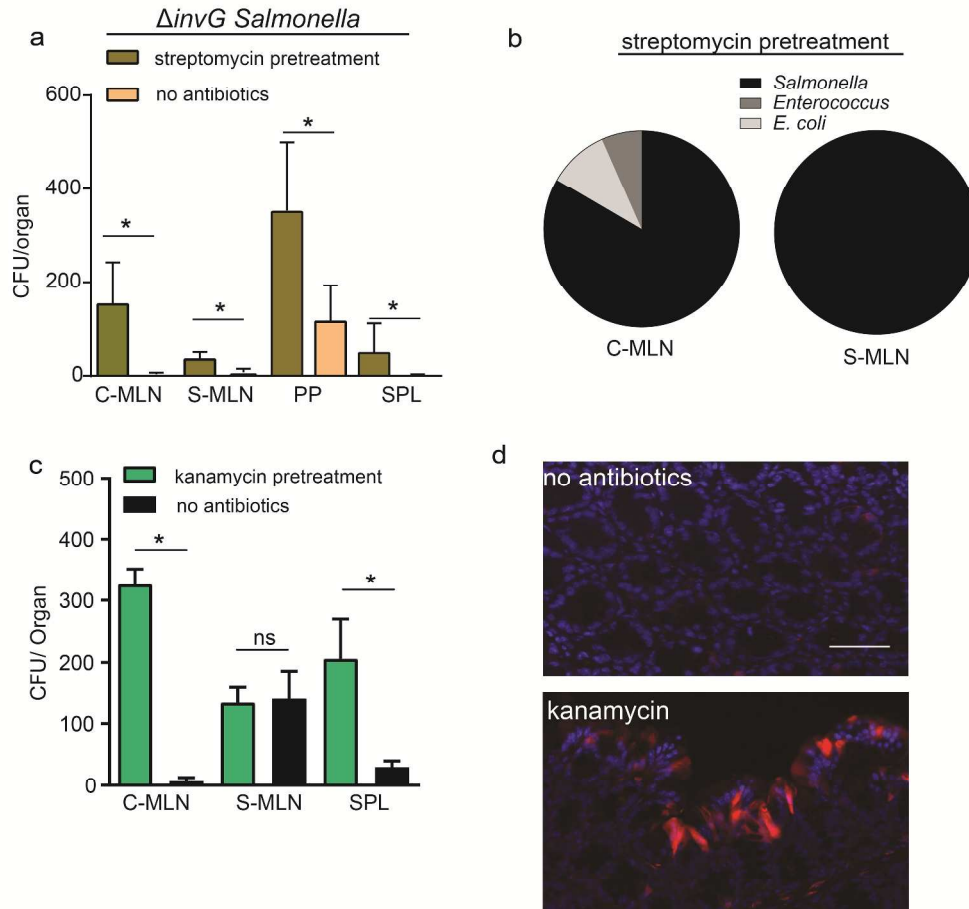

Figure S4

**Supp Figure 4:** Pretreatment with *streptomycin* or *kanamycin* promotes dissemination of *ΔinvG Salmonella* and gut commensals to the colon draining MLN. a) CFUs in the MLNs, PP, and spleen (SPL) two days after infection with  $5 \times 10^7$  CFU *ΔinvG Salmonella* in untreated or streptomycin-pretreated C57BL/6 mice. b) Pie chart depicting live bacterial species identified by MALDI-TOF Biotyper isolated from the colon-draining MLN (C-MLN) or SI-draining MLN (S-MLN) of streptomycin-pretreated mice 2 days after infection with  $5 \times 10^7$  CFU *Salmonella*. c) CFUs in the MLNs and SPL 2 days after infection with  $5 \times 10^7$  CFU *Salmonella* in untreated mice or mice pretreated with kanamycin. d) Representative fluorescence image of colon from an untreated (no antibiotics) or kanamycin-treated mouse given luminal dextran for 45 min,

demonstrating colonic GAPs following kanamycin pretreatment. Data represented as the mean  $\pm$ SEM, Scale bar in d= 50  $\mu$ m. \*p<0.05, ns- not significant. n=3 or more mice in each group.

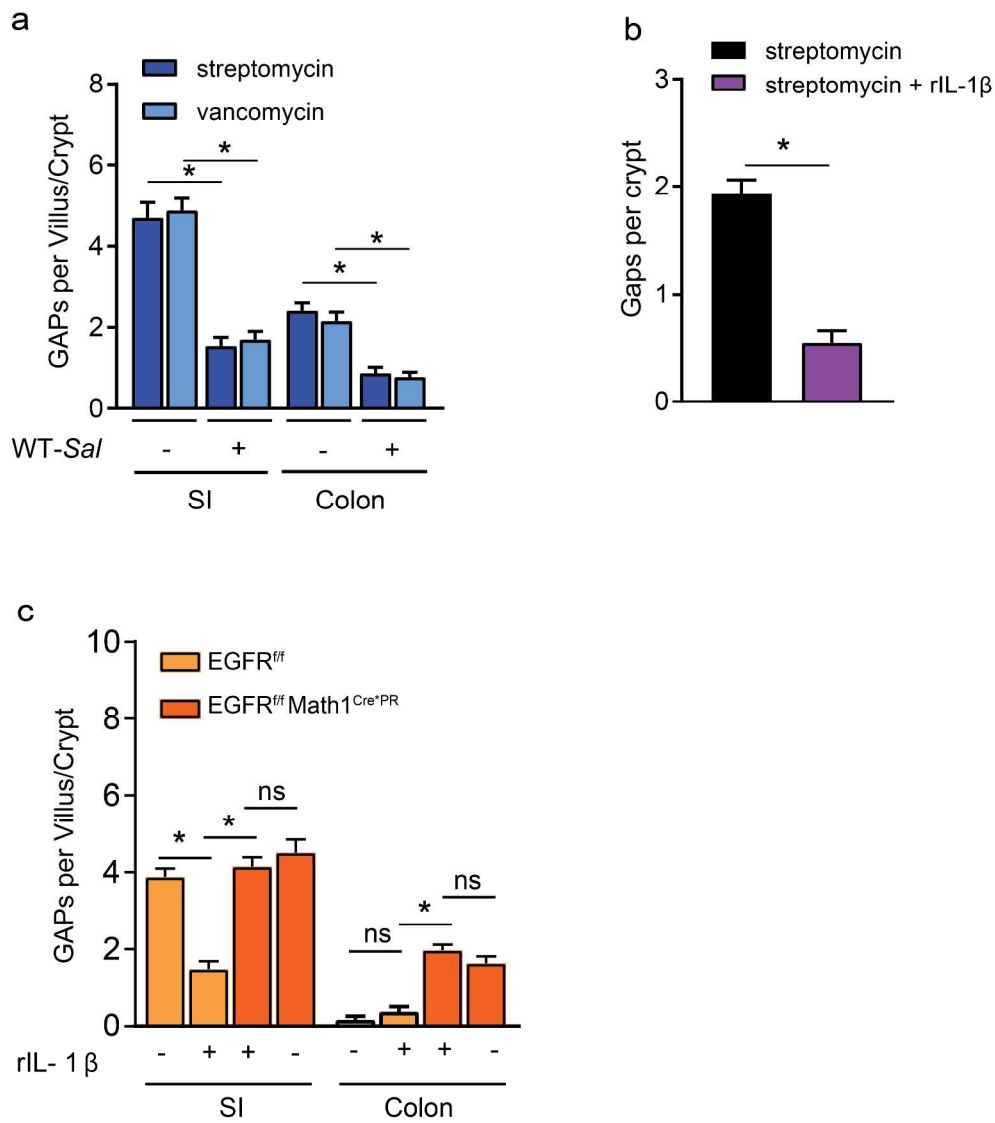

**Supp Figure 5: Antibiotic-induced colonic GAPs are suppressed during *Salmonella* infection via IL-1 $\beta$  and EGFR signaling pathway.** a) GAP density in the SI villus or colonic crypt in untreated or antibiotic-treated mice that were uninfected or given  $5 \times 10^7$  CFU wildtype *Salmonella* 2 d earlier. b) Density of colonic GAPs in C57BL/6 mice 3 days post streptomycin (500  $\mu$ g) gavage and 1 hr after i.p. injection of vehicle or 100 ng recombinant IL-1 $\beta$ . c) SI and colonic GAP density in EGFR<sup>ff</sup> and EGFR<sup>ff</sup> Math1<sup>Cre<sup>PR</sup></sup> mice treated with RU486 for 5 d, and administered

with PBS or 100 ng recombinant IL-1 $\beta$ . Data represented as the mean  $\pm$ SEM, \* $p$ <0.05, ns- not significant.  $n=3$  or more mice per group.



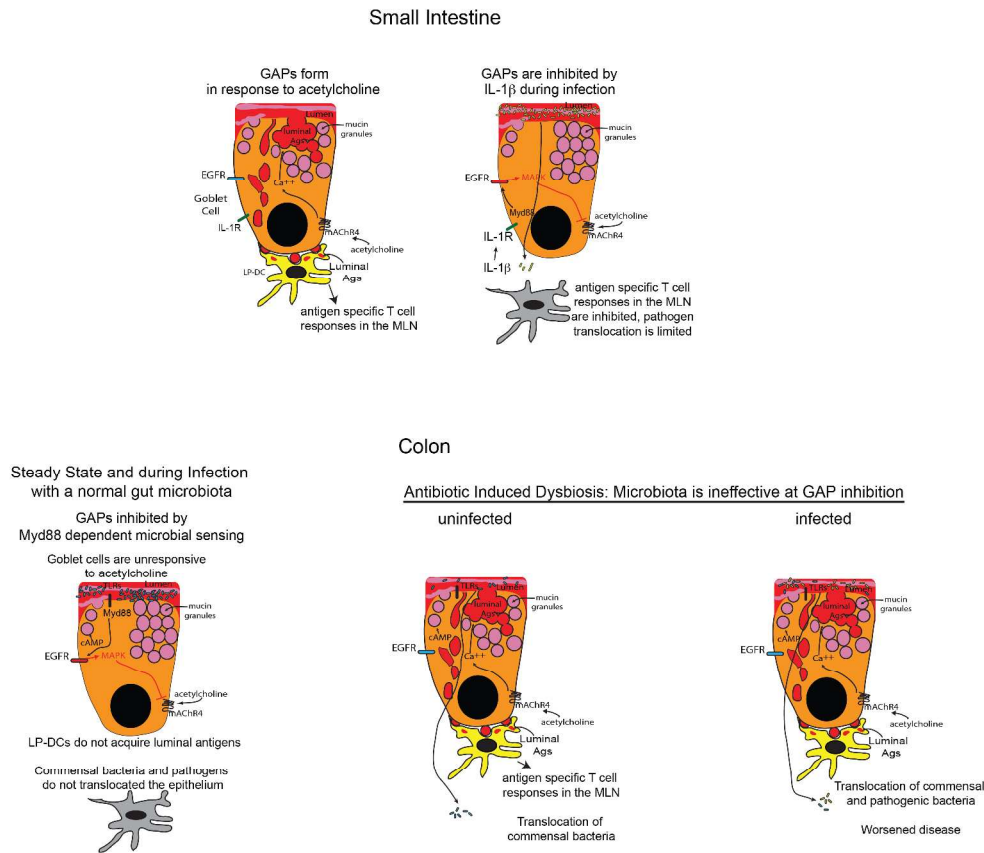

Figure S6

**Supp Figure 6:** *Inhibition of GAP formation to limit responses to dietary antigen and pathogen dissemination during enteric infection.* (upper panel) GAPs, dietary antigen delivery to the LP-DCs, and immune responses to dietary antigen in the SI draining MLN are acutely inhibited during enteric infection with *Salmonella* by IL-1 $\beta$  activating MyD88 and EGFR in GCs, suppressing the ability of GCs to respond to acetylcholine and form a GAP. Translocation of *Salmonella* to the SI draining MLN required GCs and correlated with GAP density. Overriding GAP inhibition during *Salmonella* infection resulted in inflammatory antigen specific T cell responses to dietary antigen in the SI draining MLN (not depicted). (lower panel) During the steady-state, colonic GCs do not form GAPs due to GC intrinsic sensing of the dense colonic microbiota and *Salmonella* does not translocate across the colonic epithelium. However

dysbiosis following a single dose of some antibiotics, or deletion of MyD88 or EGFR withing GCs, results in formation of colonic GAPs, which allows *Salmonella* to translocate across the epithelium resulting in worsened disease.
